# Supplementary material
Source: publisher site journal article supplement (http://www.degruyter.com/publication/journal_key/FCA/downloadAsset/FCA_Instructions_for_authors_2020.pdf)
Supplement: Supplementary file 1 [file FCA_Instructions_for_authors_2020.pdf]

## INSTRUCTIONS FOR AUTHORS IN “FCAA”

John A. Smith <sup>1</sup>, Virginia S. Kiryakova <sup>2</sup>

### Abstract

Text of abstract follows in 5-10 lines. “FCAA” is L<sup>A</sup>T<sub>E</sub>X published journal. To prepare a manuscript, use “FCAA-template-for-authors.tex” which is made with “\documentclass[11pt]{article}”, page size “\textwidth 12.5cm, \textheight 19cm”. The auxiliary files “fcaa-var.cls”, “fcaa\_style\_DG.tex” and template are available in “Authors Kit” folder at the journal’s websites, or by e-mail. Follow strictly the style of the sample and of the papers published in “FCAA”, do *NOT* change any details. Recommended size is 12-20 pages for Research Papers and up to 32 pages for Surveys.

*MSC 2010:* 26A33, 33E12, 34A08, 34K37, 35R11, 60G22

*Key Words and Phrases:* fractional calculus, special functions, integral transforms

### 1. Introduction

Headings like DEFINITION, THEOREM, LEMMA, REMARK are indented and typed in SMALL CAPITALS, *the text of the propositions should be slanted*, P r o o f. spaced and indented, ended by  $\square$ ; the equations numbered at the right hand-side. References are arranged in Alphabetic order by Family Names, strictly in the style as below. To create internal hyperlinks, use commands and texts like: \begin{theorem}\label{Th#} ... \end{theorem}; \begin{equation}\label{Eq#} ... \end{equation}; \section, ... equation (\ref{Eq#}) in Theorem~\ref{Th#} ...; \bibitem{Ref#} and \cite{Ref#}. The figures should be input in L<sup>A</sup>T<sub>E</sub>X in eps-format but both eps- and pdf-files should be provided. Appendices and Acknowledgements (if any) are before References.

### References

- [1] V.S. Kiryakova, *Title of Book*. Publisher, Town (19xx).
- [2] J.A. Smith, Title of the paper. *Journal Name* **xx**, No x (20xx), xxx-xxx; DOI (if available).

<sup>1</sup> *Postal Address of First Author ... ,  
e-mail: ...*

<sup>2</sup> *Postal Address of Second Author ... ,  
e-mail: ... (Corr. author)*

*Received: Month xx (Date), Year*
